# Supplementary material for: The FKBPL-based therapeutic peptide, AD-01, protects the endothelium from hypoxia-induced damage by stabilising hypoxia inducible factor-α and inflammation
Source: Springer Nature journal article supplement (doi:10.1186/s12967-025-06118-w), 2025-03-11
Supplement: MOESM1 [file 12967_2025_6118_MOESM1_ESM.pdf]

# ***FKBPL-based therapeutic peptide, AD-01, protects endothelium from hypoxia-induced damage by stabilising hypoxia inducible factor- $\alpha$ and inflammation***

*Sahar Ghorbanpour<sup>1,2\*</sup>, Siân Peta Cartland<sup>2</sup>, Hao Chen<sup>1</sup>, Sanchit Seth<sup>3,4,5</sup>, Rupert C. Ecker<sup>3,4,5</sup>, Claire Richards<sup>1</sup>, Dunja Aksentijevic<sup>6</sup>, Matthew P Padula<sup>1</sup>, Louise Cole<sup>7</sup>, Majid Ebrahimi Warkiani<sup>8</sup>, Mary Meltem Kavurma<sup>2</sup>, Lana McClements<sup>1#</sup>*

# Corresponding author

1. *School of Life Sciences & Institute for Biomedical Materials and Devices, Faculty of Science, University of Technology Sydney, NSW, Australia*
2. Heart Research Institute, The University of Sydney, Sydney, NSW, Australia
3. School of Biomedical Sciences, Faculty of Health, Queensland University of Technology, Brisbane, QLD, Australia.
4. TissueGnostics Australia Pty Ltd, Brisbane, QLD, Australia.
5. Translational Research Institute, 37 Kent Street, Woolloongabba, QLD 4102, Australia
6. Centre for Biochemical Pharmacology, William Harvey Research Institute, Barts and the London School of Medicine and Dentistry, Queen Mary University of London, London, UK.
7. The Australian Institute for Microbiology and Infection (AIMI), Faculty of Science, University of Technology Sydney, NSW, Australia
8. School of Biomedical Engineering, Faculty of Engineering and Information Technology, University of Technology Sydney, NSW, Australia

**Keywords:** FKBPL, angiogenesis, hypoxia, inflammation, Endothelial dysfunction, Microfluidics

## **Proteomics sample preparation and Mass spectrometry settings**

Briefly, 10 µg of HMEC-1 protein lysates were digested with 100 ng sequencing grade trypsin (Promega, USA) for 18 h at 37°C. The digestion was stopped by adding an equal volume of acetonitrile containing 1 % trifluoroacetic (TFA). To clean, concentrate and enrich the peptide mixtures, STop-And-Go-Extraction tips (STAGE Tips) were used. STAGE Tips were generated by punching double stack 47 mm styrene divinyl benzene-reversed-phase sulfonate (SDB-RPS Empore, 3M) disk by 14-gauge needle and inserted into 100 µL tips. STAGE Tips were activated with 100 µL 100 % acetonitrile and centrifuged at 1000 g for 1 min followed by equilibration step using 100 µL 0.1 % TFA in water and 30 % methanol/1 % TFA with centrifugation at 1000 g for 3 min. Then, each STAGE Tip was loaded with ~ 10 µg digested peptides and washed twice by 100 µL 99 % ethyl acetate/1 % TFA. Afterwards, each STAGE Tip were washed with 100 µL 0.2 % TFA in water and centrifuged at 1000 g for 1 min. For elution of peptides, 100 µL 5 % ammonium hydroxide/80 % acetonitrile was added to each tip and centrifuged at 1000 g for 5 min. The samples were collected in autosampler vials (Thermo Fisher, USA) and dried using SpeedVac vacuum concentrator (Thermo Fisher) at 40 °C for one hour. Finally, dried peptide samples were resuspended in 20 µL 0.1 % formic acid (final concentration 0.5 µg/µL) and analysed by LC-MS/MS as previously described (Roediger et al., 2018). The samples were processed using an Acquity M-class nanoLC system to load 5 µL of sample onto a nanoEase Symmetry C18 trapping column (180 µm × 20 mm) at 15 µL/min rate for 3 min. This was followed by washing of a column equipped with a laser pulled emitter (75 µm ID × 350 mm) filled with SP-120–1.7-ODS-BIO resin (1.7 µm, Osaka Soda Co, Japan) and heated up to 45°C. Peptides were eluted from the column and into the source of a Q-Exactive Plus mass spectrometer (Thermo Fischer): 5–30 % MS buffer (98 % acetonitrile + 0.2 % formic acid) for 90 min, 30–80 % MS buffer for three min, 80 % MS buffer for 2 min, and 80–5 % MS buffer for 3 min. Ionisation of the eluted peptides was performed at 2400 V. A Data Dependent MS/MS (dd-MS<sup>2</sup>) experiment was then conducted using 350 – 1500 m/z survey scan (70,000 resolution) with an AGC target of 3e<sup>6</sup> and 50 milliseconds injection time for peptides with charge states of 2+ or higher. An isolation window of 1.4 m/z, an AGC target of 1e<sup>5</sup>, and a maximum injection time of 100 milliseconds were used to selectively fragment the top 12 peptides in the HCD cell. Using the Orbitrap analyser at 17,500 resolution, fragment masses were measured over a mass range of 120–2000 m/z. Precursor peptide masses were excluded for 30 seconds.

## Proteomics data analysis

The setup of software for discovery proteomics experiment was previously described (Chen et al., 2022). The MS/MS data files generated using extracted samples were searched in PEAKS Studio X + (Bioinformatics solution) against the human proteome database (2019). The results of the search were then filtered to include peptides with a  $-\log_{10}P$  score that was determined by the False Discovery Rate (FDR) of  $< 1\%$ , in which decoy database search matches were  $< 1\%$  of the total matches. All statistical analyses were performed in R (v4.2.0). The proteomic data were Total Ion Count (TIC)-normalised followed by  $\log_2$ -transformed. A pattern of Missing at Random (MAR) of missing values was found in the data, in which the proteins were detected in some biological replicates but not all in a group. Samples with missing values  $> 85\%$  were removed. The missing values were imputed using the k-nearest neighbour (KNN) method that is optimal for MAR pattern. Data were filtered for any proteins identified in all biological replicates in at least one group, followed by normalisation using Variance Stabilising Normalisation (VSN) through the DEP package (v1.20.0) (Zhang et al., 2018). Principle component analysis (PCA) was performed using the top 500 variable proteins. Differential enrichment analysis was performed using the limma package (v3.54.2) (Ritchie et al., 2015) for the following comparisons: (1) FKBPL siRNA vs FKBPL siRNA+AD-01, (2) DMOG vs DMOG+AD-01 vs control (3) MCM vs MCM+AD-01 vs control. Significant proteins were defined at a FDR  $< 0.05$ . Enriched pathways in AD-01 or stimulus treatment groups were identified by ranking the proteins into descending  $\log_2$  ratio in individual comparison and performing Gene Set Enrichment Analysis (GSEA) using clusterProfiler (v4.6.2) (Wu et al., 2021; Yu et al., 2012) through all pathways in KEGG database (Kanehisa et al., 2023). Significantly enriched pathways were defined as p-value  $< 0.05$ .



MCM had no effect on FKBPL expression after 24 h of treatment, while significantly increased the expression of FKBPL at 48 and 72 of treatment. SiRNA control, non-targeted siRNA. DMOG, MCM control, untreated cells. FKBPL protein expression was normalized to GAPDH. Results are mean  $\pm$  SEM, n=3. Data passed Shapiro-Wilk normality test. One-way ANOVA with Tukey post-hoc test, \*p<0.05, \*\*p<0.01, \*\*\*p<0.001, \*\*\*\*p<0.0001.

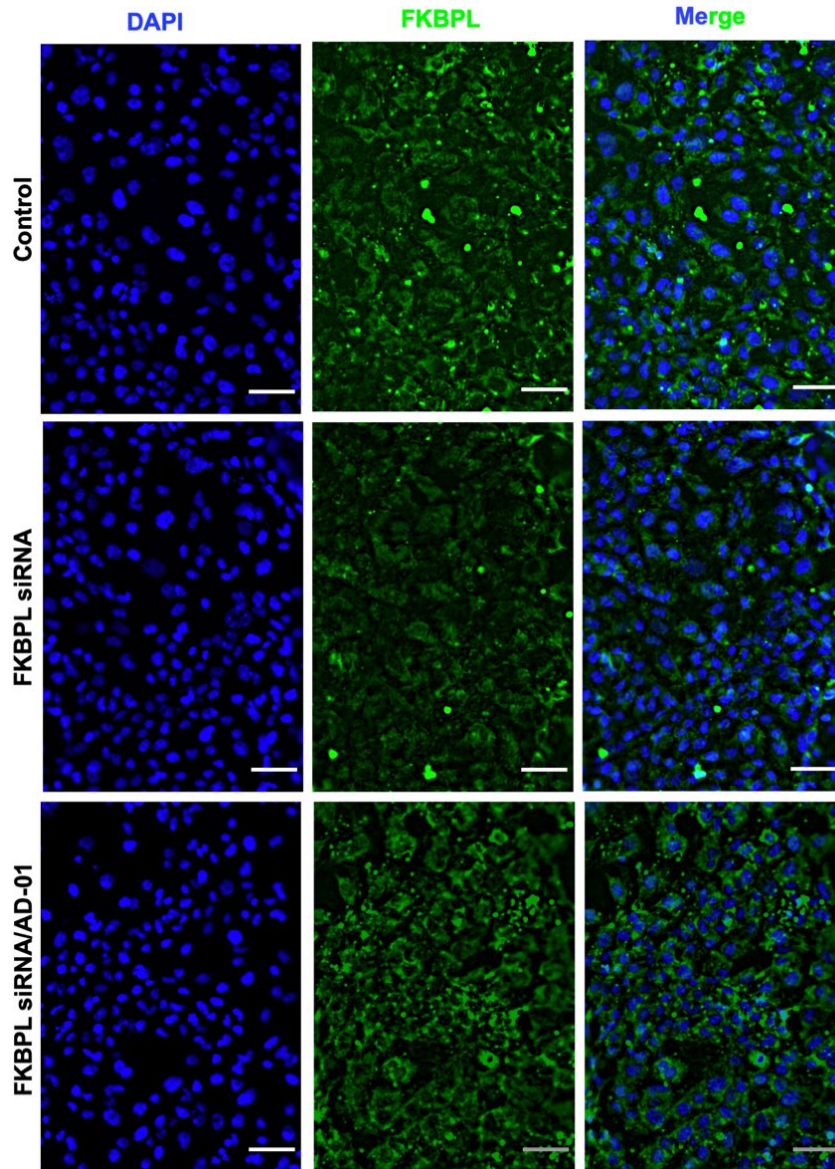

**Figure 2: Representative images of FKBPL expression in HMEC-1 cultured in 3D microfluidics chips with collagen.** Immunofluorescence images of HMEC-1 cells were taken to quantify the expression of FKBPL, following treatment with 24  $\mu$ M siRNA  $\pm$  100 nM AD-01 for 72 h. Chips were probed for immunofluorescent imaging of FKBPL and DAPI. Scalebars represent 100  $\mu$ m.

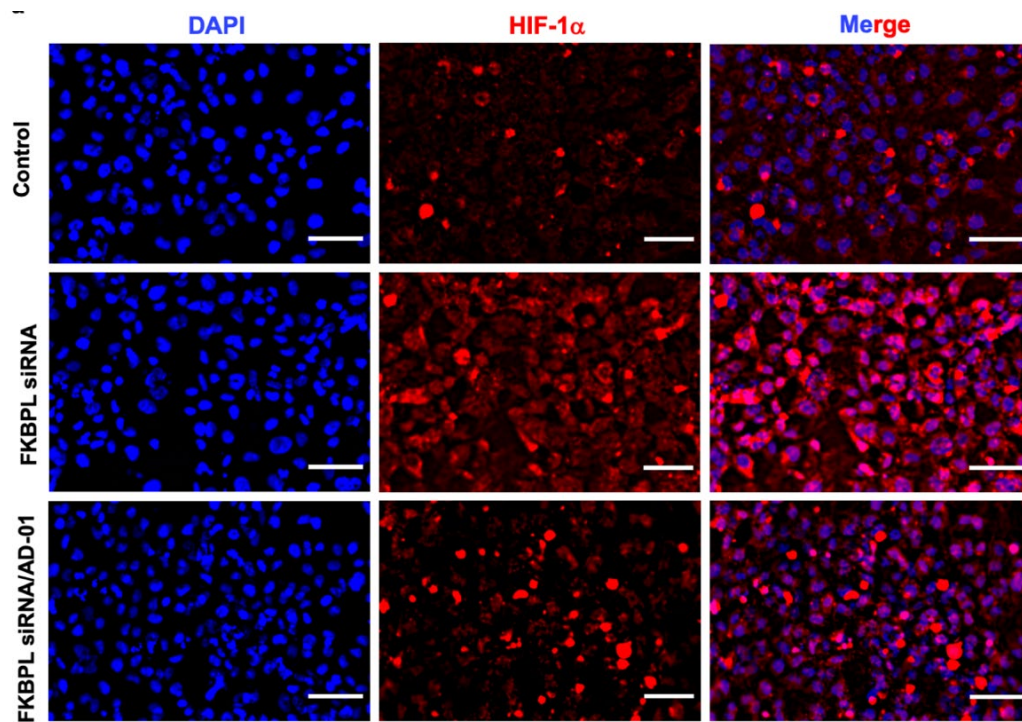

**Figure 3: Representative images of HIF-1 $\alpha$  protein expression in HMEC-1 following FKBP1 knockdown grown in 3D microfluidics chips with collagen.** Immunofluorescence images of HMEC-1 cells were taken to quantify the expression of HIF-1 $\alpha$ , following treatment with 24  $\mu$ M siRNA  $\pm$  100 nM AD-0 for 72 h. As control for siRNA treatment, non-targeted siRNA was used. Following 72 h of culture, chips were probed for immunofluorescent imaging of HIF-1 $\alpha$  and DAPI. Scalebars represent 100  $\mu$ m.



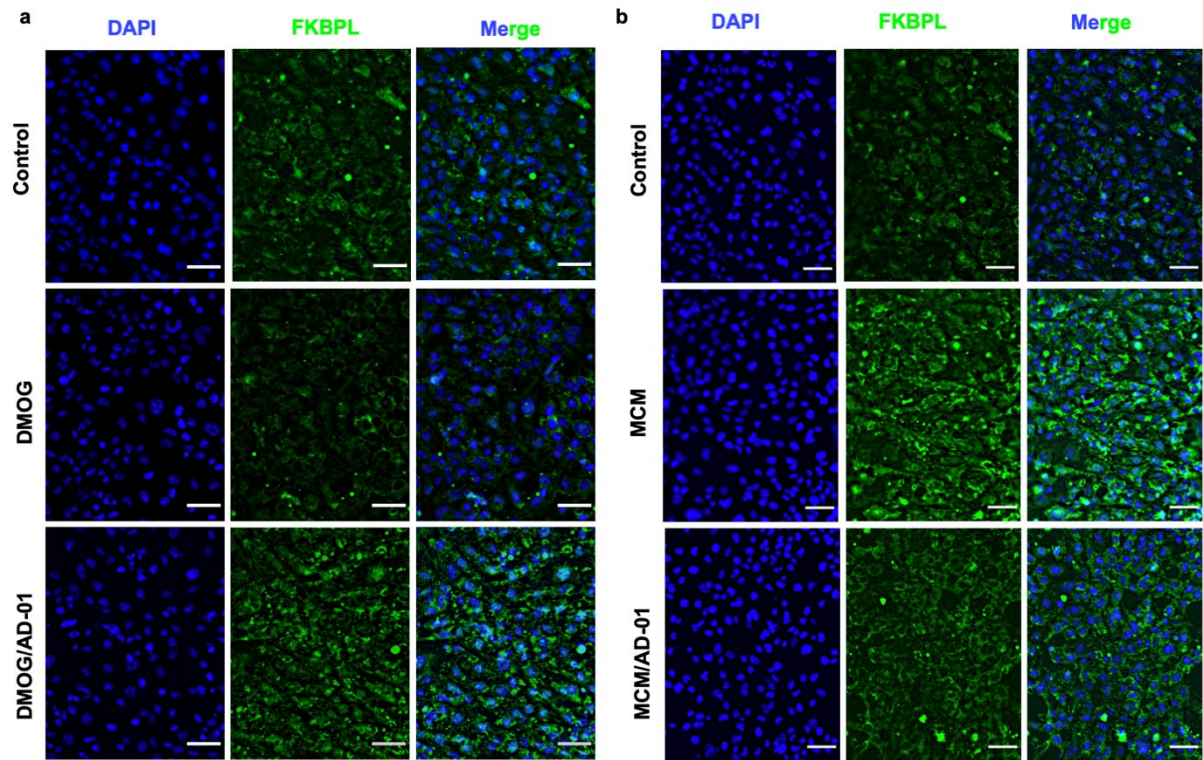

**Figure 4: Representative images of FKBPL protein expression in HMEC-1 cultured in 3D microfluidics chips with collagen in the presence of hypoxic stimuli.** In 3D-microfluidic setting, collagen matrix (2.5 mg/mL) was added to the central channel and HMEC-1 cells were added to the side channel of microfluidic chips. Cells were treated with 1 mM DMOG and 50 % MCM  $\pm$  100 nM AD-01 for 72 h. Following 72 h of culture, chips were probed for immunofluorescent imaging of FKBPL and DAPI. (a), (b) Representative immunofluorescence images of HMEC-1 cells were taken to quantify the expression of FKBPL, following treatment with DMOG and MCM  $\pm$  AD-01 respectively. Scalebars represent 100  $\mu$ m.

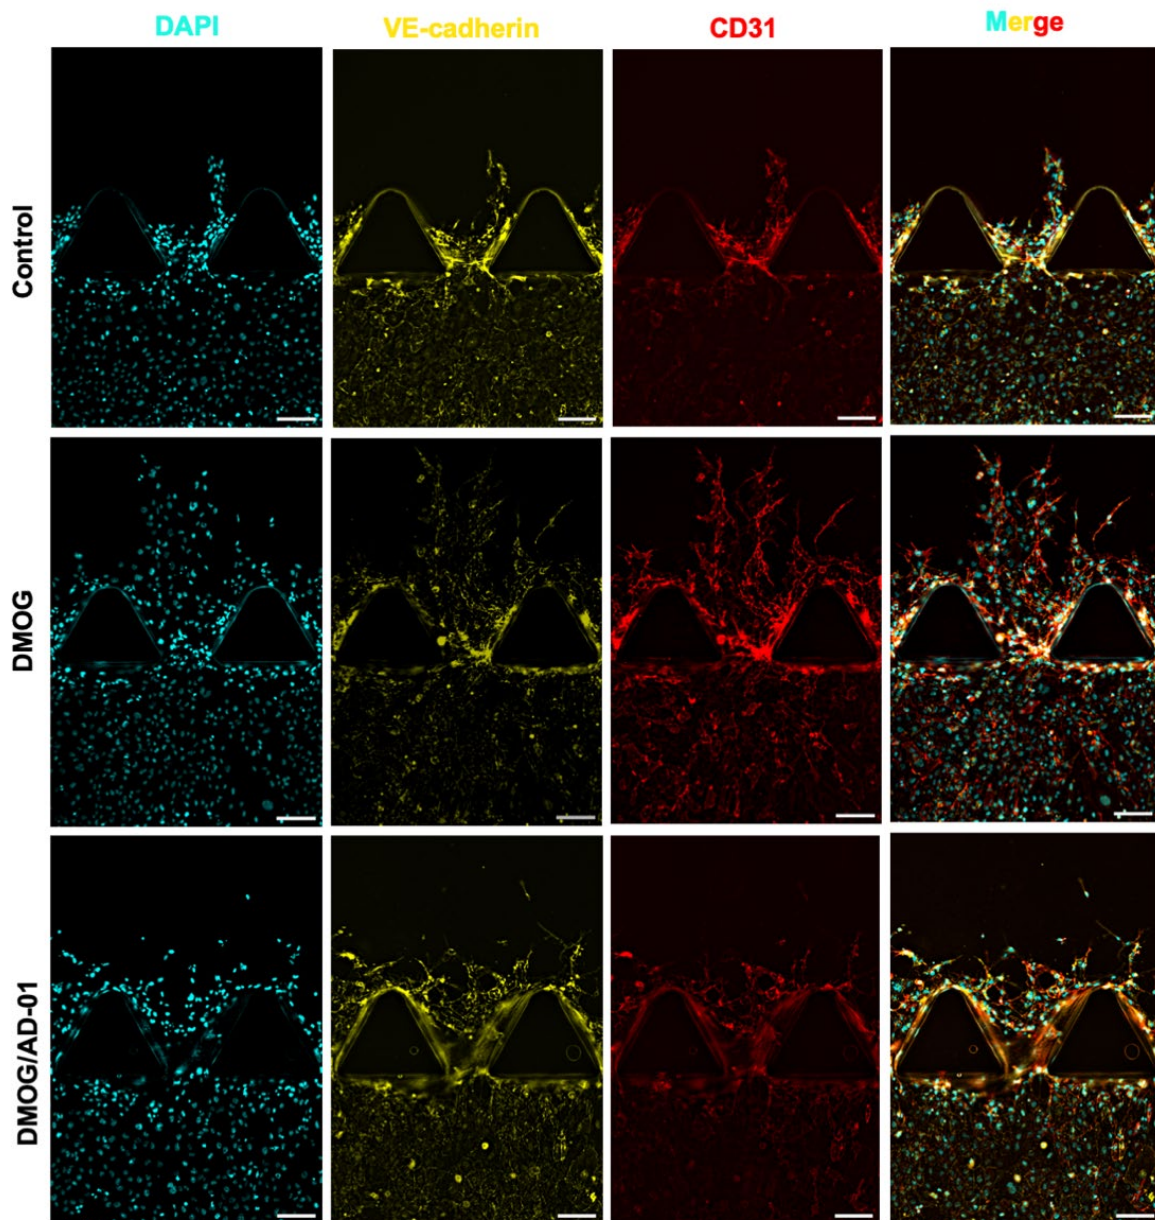

**Figure 5: Representative images of VE-cadherin and CD31 protein expression in HMEC-1 cultured in 3D microfluidics chips with collagen in hypoxic conditions.** To set up the 3D-microfluidic devices, a collagen matrix (2.5 mg/mL) was added into the central channel and HMEC-1 cells were added to the side channel of microfluidic chips. HMEC-1 cells were treated with 1 mM DMOG  $\pm$  100 nM AD-01 for 72 h with untreated cells serving as the control. After 72 h, chips were probed for immunofluorescent imaging of VE-cadherin, CD31 and DAPI. Representative immunofluorescence images of HMEC-1 cells were taken to quantify the expression VE-cadherin, CD31 of following treatment with DMOG  $\pm$  AD-01, respectively. Scalebars indicate 100  $\mu$ m.



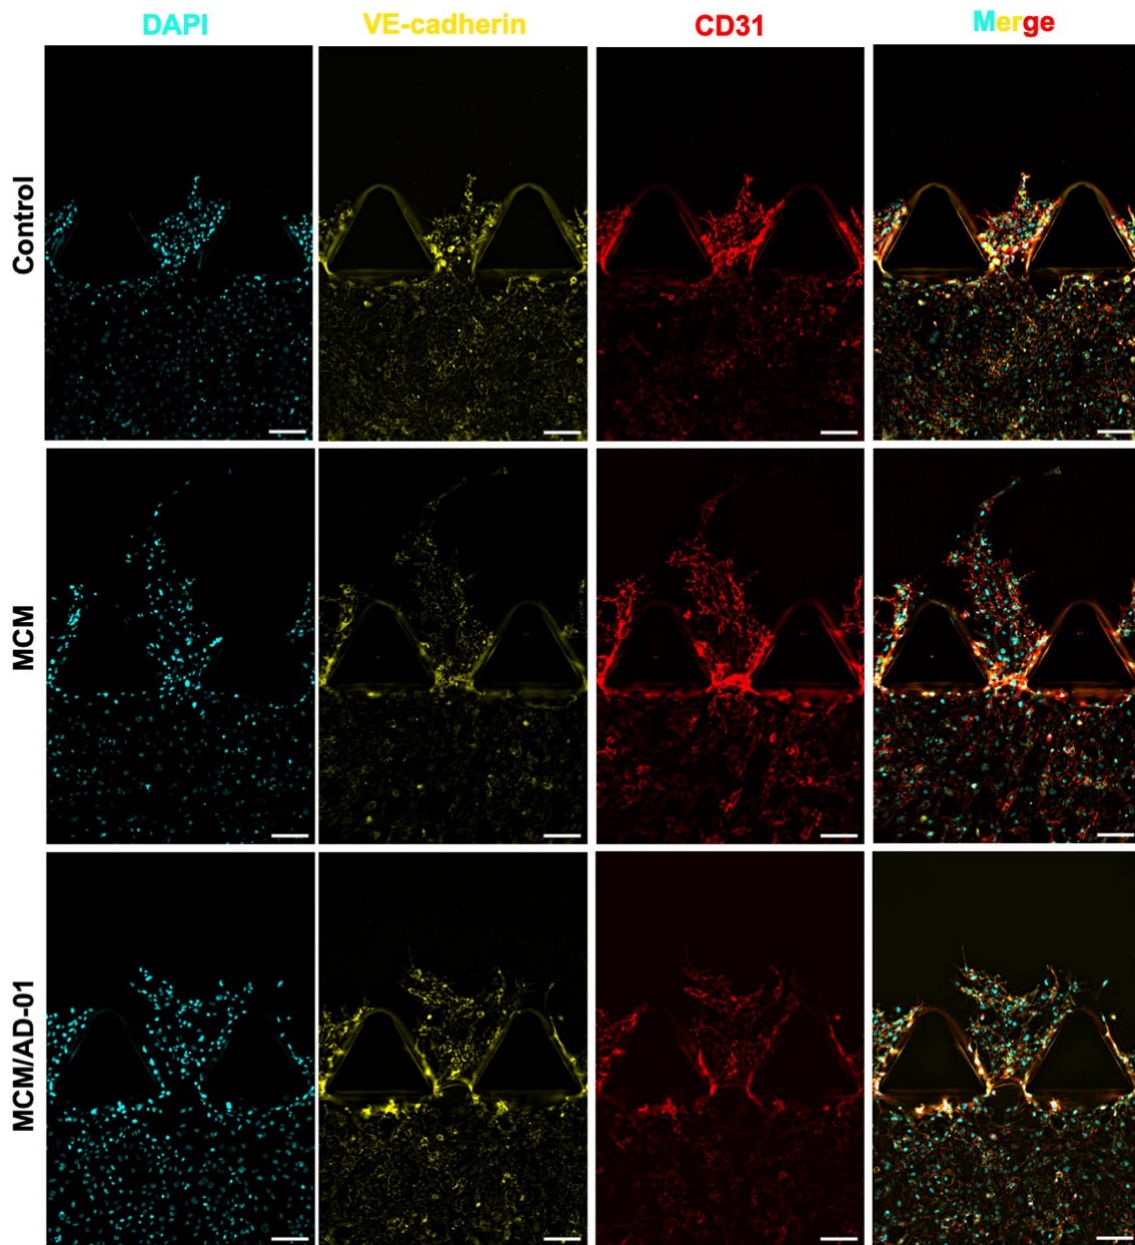

**Figure 6: Representative images of VE-cadherin and CD31 protein expression in HMEC-1 cultured in 3D microfluidics chips with collagen in inflammatory conditions.** The 3D-microfluidic devices were set up by introducing a collagen matrix (2.5 mg/mL) was added into the central channel and adding HMEC-1 cells to the side channel of microfluidic chips. HMEC-1 cells were treated with 50 % MCM  $\pm$  100 nM AD-01 for 72 h with untreated cells as the control. After 72 h, chips were subjected to immunofluorescent imaging of VE-cadherin, CD31 and DAPI. Representative immunofluorescence images of HMEC-1 cells were taken to quantify the expression VE-cadherin, CD31 of following treatment with MCM  $\pm$  AD-01, respectively. Scalebars indicate 100  $\mu$ m.

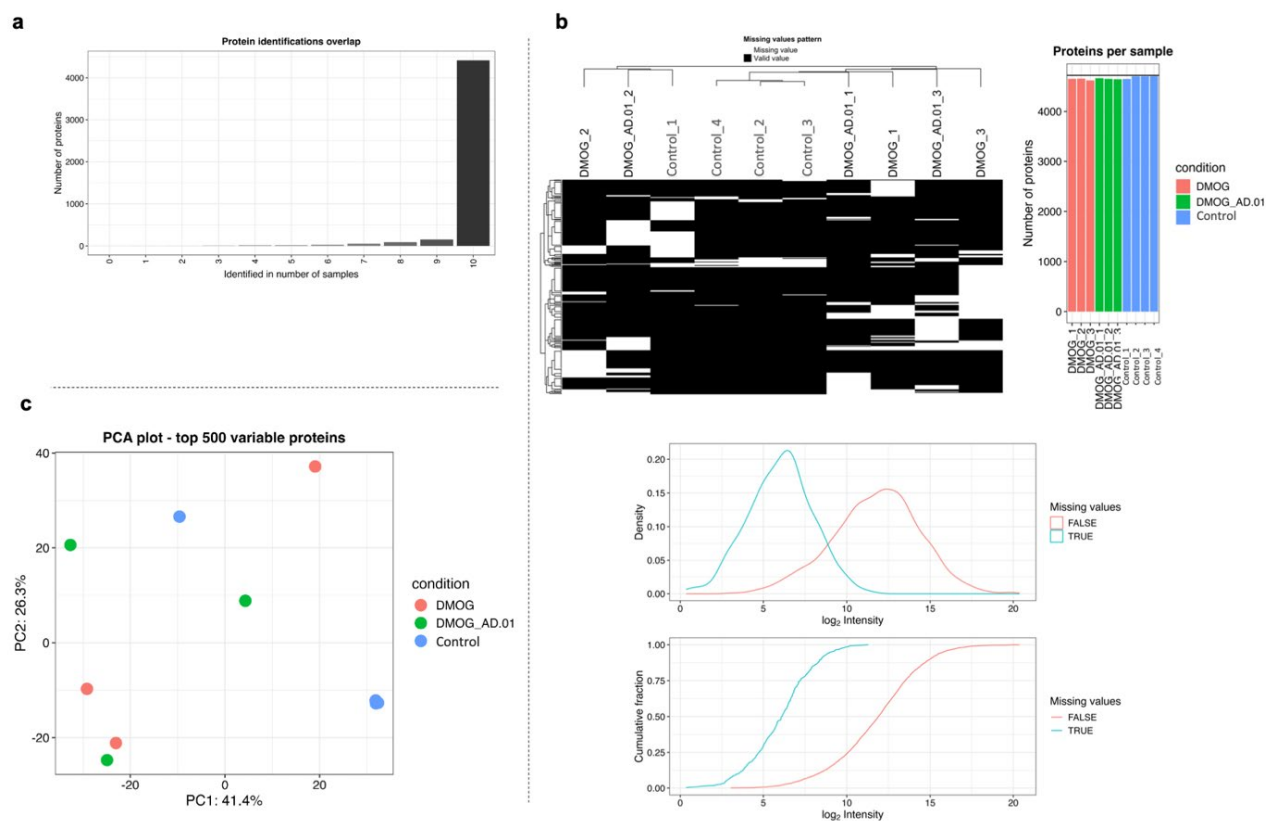

**Figure 7: Pre-processing of proteomics data.** Proteomics results of HMEC-1 cells protein lysate after 72 h treatments with 1 mM DMOG  $\pm$  100 nM AD-01. **(a)** Investigation of the distribution of missing values across samples. **(b)** Investigation of the pattern of missing values. **(c)** PCA plot of relatively consistent condition-specific clustering of samples.

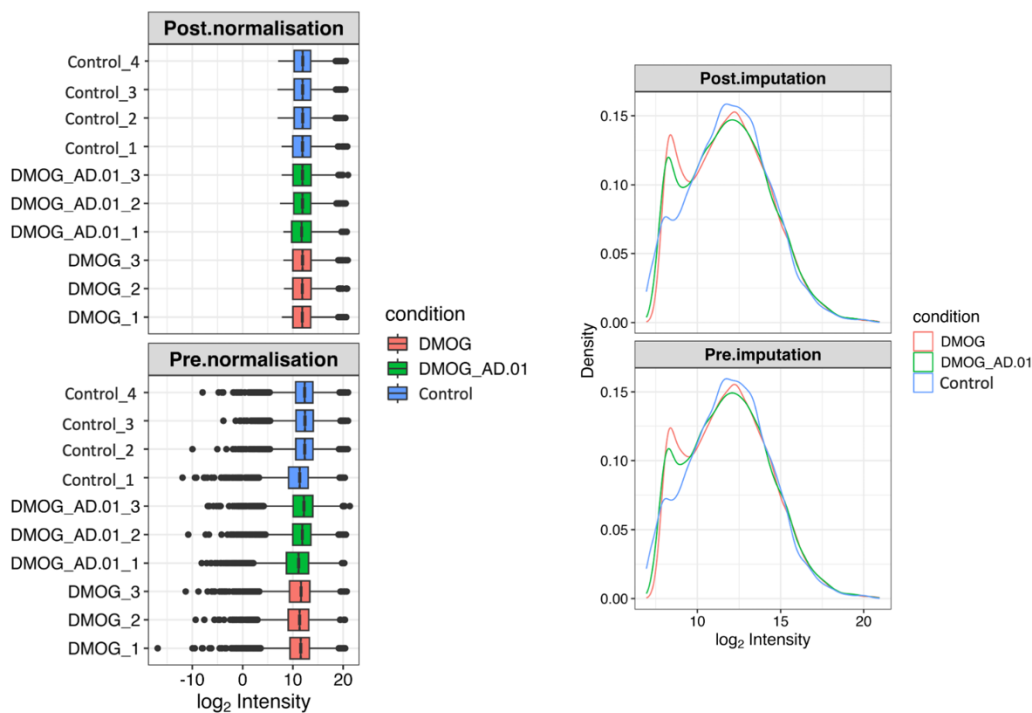

**Figure 8: Pre-processing of proteomics data.** Comparisons of pre- and post-normalisations and imputations in all analysis cascades of DMOG, DMOG + AD-01 and control.

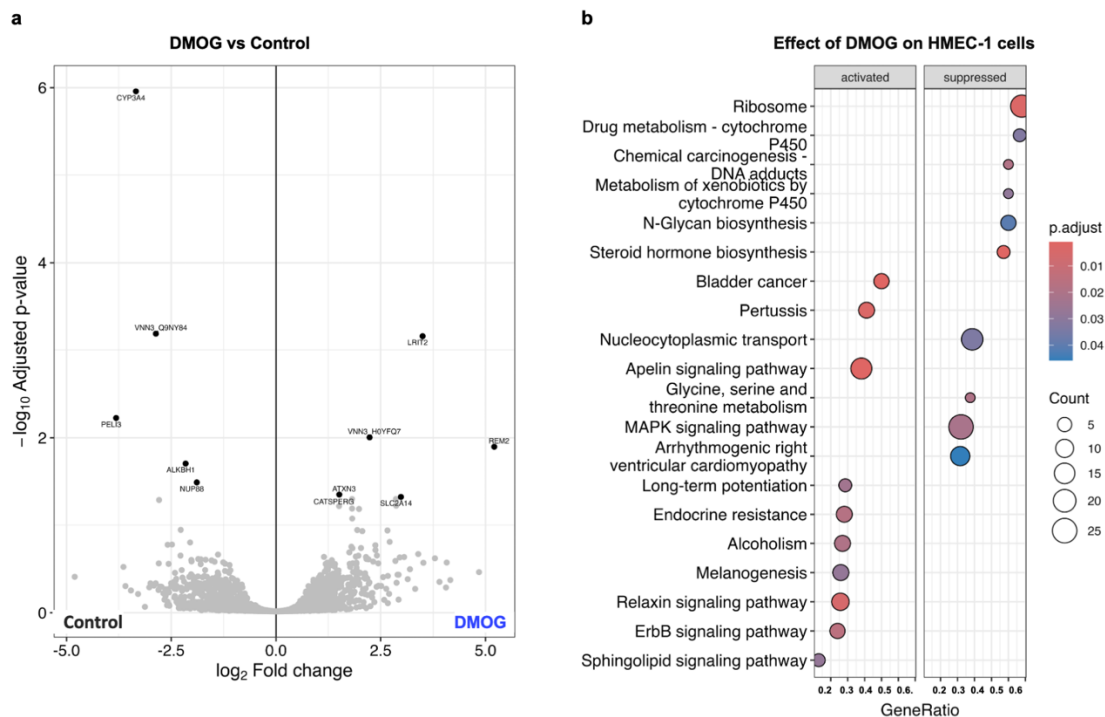

**Figure 9: Proteome investigation of the effect of DMOG on HMEC-1 cells.** (a) Differential enrichment analysis comparing HMEC-1 cells treated with DMOG and control. (b) Comparison between top 20 pathways enriched in HMEC-1 cells treated with DMOG.

**Table 1: Downstream protein targets of DMOG in HMEC cells.** A description of down- and up-regulated proteins identified when DMOG and Control proteomic profiles were compared.

| Protein group(s) | Gene ID    | Protein description                                                                           | p-Value  | Log FC |
|------------------|------------|-----------------------------------------------------------------------------------------------|----------|--------|
| ALKBH1           | H0YJF3     | AlkB homolog 1, histone H2A dioxygenase                                                       | 0.0197   | -2.16  |
| CYP3A4           | A0A494C0W7 | Cytochrome P450 family 3 subfamily A member 4                                                 | 1.1e-06  | -3.34  |
| NUP88            | J3KMX1     | Nucleoporin 88                                                                                | 0.0324   | -1.89  |
| PELI3            | Q8N2H9     | E3 ubiquitin-protein ligase pellino homolog 3                                                 | 0.00596  | -3.81  |
| CATSPERG         | B8ZZI7     | Cation channel sperm associated auxiliary subunit gamma                                       | 0.0447   | 1.51   |
| LRIT2            | A6NDA9     | Leucine-rich repeat, immunoglobulin-like domain and transmembrane domain-containing protein 2 | 0.000694 | 3.5    |
| VNN3_H0YFQ7      | H0YFQ7     | Vanin 3                                                                                       | 0.0099   | 2.24   |
| REM2             | Q8IYK8     | GTP-binding protein REM 2                                                                     | 0.0127   | 5.21   |
| SLC2A14          | Q8TDB8     | Solute carrier family 2, facilitated glucose transporter member 14                            | 0.0476   | 2.98   |

**Table 2 Downstream protein targets of AD-01 on DMOG-treated HMEC cells.** A description of down- and up-regulated proteins identified when DMOG and DMOG/AD-01 proteomic profiles were compared.

| Protein group(s) | Gene ID    | Protein description                                     | p-Value  | Log FC |
|------------------|------------|---------------------------------------------------------|----------|--------|
| KIR3DL3          | A0A0B4J1R5 | Killer cell immunoglobulin-like receptor 3DL3           | 0.033    | 1.18   |
| MYO1A            | Q9UBC5     | Unconventional myosin-Ia                                | 0.00873  | -1.15  |
| NAP1L1           | B7Z9C2     | Nucleosome assembly protein 1 like 1                    | 0.000614 | -1.76  |
| RGS7             | P49802     | Regulator of G-protein signaling 7                      | 0.0343   | -2.26  |
| SEPTIN10_B5ME97  | B5ME97     | Septin 10                                               | 1.7e-05  | -1.89  |
| TJP3             | O95049     | Tight junction protein-3                                | 0.0407   | -1.21  |
| WDR33            | Q9C0J8     | pre-mRNA 3' end processing protein WDR33                | 0.00872  | -2.2   |
| XPOT             | O43592     | Exportin-T                                              | 0.0416   | -1.02  |
| PLEKHG2          | Q9H7P9     | Pleckstrin homology domain-containing family G member 2 | 0.00687  | -2.13  |
| ACSM2A           | E7EPS5     | Acyl-CoA synthetase medium chain family member 2A       | 0.0149   | 2.18   |



|                                                   |            |                                                                  |          |      |
|---------------------------------------------------|------------|------------------------------------------------------------------|----------|------|
| ALKBH1                                            | H0YJF3     | AlkB homolog 1, histone H2A dioxygenase                          | 0.0273   | 1.33 |
| COL19A1                                           | Q14993     | Collagen alpha-1(XIX) chain                                      | 0.000573 | 3.03 |
| COPS7B                                            | J3QT95     | COP9 signalosome subunit 7B                                      | 0.0104   | 1.74 |
| CYP2D6                                            | A0A0G2JLK7 | Cytochrome P450 2D6                                              | 0.000547 | 1.28 |
| DDX11                                             | Q96FC9     | ATP-dependent DNA helicase DDX11                                 | 0.0119   | 1.84 |
| ECT2                                              | Q9H8V3     | Protein ECT2                                                     | 0.0378   | 1.29 |
| IRAG1                                             | Q9Y6F6     | Inositol 1,4,5-triphosphate receptor associated 1                | 0.0451   | 1.68 |
| JCAD                                              | Q9P266     | Junctional cadherin 5-associated protein                         | 0.00821  | 1.27 |
| KCNA3                                             | P22001     | Potassium voltage-gated channel subfamily A member 3             | 0.00481  | 1.53 |
| LMNTD1                                            | Q8N9Z9     | Lamin tail domain-containing protein 1                           | 0.0416   | 1.73 |
| LOC101059915                                      | A0A1B0GWI6 | Uncharacterized protein                                          | 0.0456   | 1.07 |
| NBAS                                              | H0Y5G7     | NBAS subunit of NRZ tethering complex                            | 0.0368   | 1.42 |
| PIDD1                                             | Q9HB75     | p53-induced death domain-containing protein 1                    | 0.00857  | 1.88 |
| PRKG1                                             | A0A2R8Y507 | Protein kinase cGMP-dependent 1                                  | 0.0135   | 2.13 |
| Protein_kinase_domain-containing_protein_fragment | M0QX08     | Protein kinase domaincontaining protein                          | 0.0397   | 2.32 |
| PRR15                                             | Q8IV56     | Proline-rich protein 15                                          | 0.0308   | 1.57 |
| PSPC1                                             | Q8WXF1     | Paraspeckle component 1                                          | 0.0399   | 3.28 |
| RAPGEF3                                           | O95398     | Rap guanine nucleotide exchange factor 3                         | 0.0417   | 1.24 |
| RGMA                                              | A0A0A0MTQ4 | Repulsive guidance molecule A                                    | 0.00611  | 2.45 |
| RPN2                                              | P04844     | Ribophorin 2                                                     | 0.0292   | 1.69 |
| SFTPD                                             | P35247     | Pulmonary surfactant-associated protein D                        | 0.0469   | 1.47 |
| SIX6OS1                                           | Q8N1H7     | Protein SIX6OS1                                                  | 0.0147   | 2.92 |
| SLC2A11                                           | F8WB79     | Solute carrier family 2 member 1                                 | 0.0133   | 3.72 |
| SLFN11                                            | Q7Z7L1     | Schlafen family member 11                                        | 0.0483   | 1.37 |
| TRPC7                                             | Q70T25     | Transient receptor potential cation channel subfamily C member 7 | 2.08e-06 | 2.54 |

|         |            |                                                                              |          |      |
|---------|------------|------------------------------------------------------------------------------|----------|------|
| RPN2    | P04844     | Dolichyl-diphosphooligosaccharide--<br>protein glycosyltransferase subunit 2 | 0.0292   | 1.69 |
| SFTPD   | P35247     | Pulmonary surfactant-associated protein<br>D                                 | 0.0469   | 1.47 |
| SIX6OS1 | Q8N1H7     | Protein SIX6OS1                                                              | 0.0147   | 2.92 |
| SLC2A11 | F8WB79     | Solute carrier family 2 member 11                                            | 0.0133   | 3.72 |
| SLFN11  | Q7Z7L1     | Schlafen family member 11                                                    | 0.0483   | 1.37 |
| TRPC7   | Q70T25     | Transient receptor potential cation<br>channel subfamily C member 7          | 2.08e-06 | 2.54 |
| TYRP1   | P17643     | 5,6-dihydroxyindole-2-carboxylic acid<br>oxidase                             | 0.0372   | 1.38 |
| UGGT2   | Q9NYU<br>1 | UDP-glucose:glycoprotein<br>glucosyltransferase 2                            | 0.00759  | 2.31 |
| ZSCAN5B | A6NJL1     | Zinc finger and SCAN domain-<br>containing protein 5B                        | 0.00772  | 1.82 |

---
